# Supplementary material for: Analysis of Epistasis among QTLs on Heading Date based on Single Segment Substitution Lines in Rice
Source: PubMed Central journal article supplement (PMC5814450; doi:10.1038/s41598-018-20690-w), 2018-02-15
Supplement: 41598_2018_20690_MOESM1_ESM.pdf [file 41598_2018_20690_MOESM1_ESM.pdf]

# **Analysis of Epistasis among QTLs on Heading Date based on Single Segment Substitution Lines in Rice**

Zifeng Yang<sup>1#</sup>, Lingling Jin<sup>2#</sup>, Haitao Zhu<sup>1</sup>, Shaokui Wang<sup>1\*</sup>, Guiquan Zhang<sup>1\*</sup>, Guifu Liu<sup>1\*</sup>

<sup>1</sup> Guangdong Key Lab of Plant Molecular Breeding, College of Agronomy, South China Agricultural University, Guangzhou 510642, P. R. China

<sup>2</sup> College of Mathematics and Informatics, South China Agricultural University, Guangzhou 510642, P. R. China

\* Co-corresponding authors: Shaokui Wang, Guiquan Zhang and Guifu Liu

# Zifeng Yang and Lingling Jin contributed equally to this work.

Phone: +86-20-85281933

Fax: +86-20-85288311

E-mail: [guifuliu@scau.edu.cn](mailto:guifuliu@scau.edu.cn)

**Supplementary Table 1 Analysis of variance on heading date in the both cropping seasons of 2014.** Superscripts “\*” and “\*\*” indicated the significances at 5% and 1% level, respectively.

| Source of variation  | Degree of freedom | Sum of squares | Mean square | F-value    | P-value    |
|----------------------|-------------------|----------------|-------------|------------|------------|
| Environment          | 1                 | 80449.20       | 80449.20    | 62066.24** | 1.028E-293 |
| Genotype             | 60                | 25732.63       | 428.88      | 330.88**   | 3.310E-202 |
| Genotype×Environment | 60                | 5159.32        | 85.99       | 66.34**    | 8.207E-121 |
| Block                | 2                 | 4.31           | 2.15        | 1.66       | 0.19       |
| Residual error       | 242               | 313.68         | 1.30        | -          | -          |

**Supplementary Table 2 The genetic effect values of pyramiding materials based on genotypic values of HJX74 in the both seasons of 2014 (day).** SSSL was the abbreviation of single segment substitution line.  $S_i$  represented the code of SSSL <sub>$i$</sub> . *AABB*, *AABb*, *AaBB* and *AaBb* were putative genotypes of SSSL combination. Sign “-” indicated to improve flowering. Superscripts “\* and \*\*” indicated the significances at 5% and 1% level, respectively.

| SSSL combination | The early season |             |             |             | The late season |             |             |             |
|------------------|------------------|-------------|-------------|-------------|-----------------|-------------|-------------|-------------|
|                  | <i>AABB</i>      | <i>AABb</i> | <i>AaBB</i> | <i>AaBb</i> | <i>AABB</i>     | <i>AABb</i> | <i>AaBB</i> | <i>AaBb</i> |
| $S_1/S_3$        | -9.44**          | -15.8**     | -10.49**    | -10.84**    | -4.81**         | -7.37**     | -3.44**     | -3.63**     |
| $S_1/S_4$        | -15.09**         | 5.17**      | -11.02**    | -1.14       | -3.87**         | 10.32**     | 0.27        | 11.85**     |
| $S_1/S_5$        | 4.48**           | 13.42**     | 6.50**      | 15.10**     | -2.61**         | 3.07**      | 0.56        | 2.76**      |
| $S_1/S_6$        | -4.44**          | 1.07        | 2.13*       | 2.96**      | -4.22**         | -1.09       | -0.41       | 1.97*       |
| $S_1/S_8$        | -16.06**         | -8.80**     | -13.91      | -11.25**    | -7.87**         | -7.43**     | -5.09**     | -5.03**     |
| $S_2/S_5$        | 9.12**           | 16.85**     | 12.18**     | 17.10**     | 2.02*           | 2.97**      | 4.02**      | 5.78**      |
| $S_3/S_4$        | 1.83*            | 13.87**     | 1.57*       | 13.27**     | 5.39**          | 18.60**     | 5.52**      | 22.37**     |
| $S_3/S_6$        | 12.59**          | 18.58**     | 19.78**     | 12.95**     | 5.06**          | 6.15**      | 3.22**      | 4.15**      |
| $S_3/S_8$        | 3.22**           | 3.97**      | 3.97**      | 6.18**      | 2.39*           | 1.33        | 0.24        | 1.37        |
| $S_4/S_7$        | 11.28**          | 12.70**     | 4.60**      | 4.21**      | 11.29**         | 18.02**     | 8.42**      | 7.38**      |
| $S_6/S_7$        | 20.82**          | 22.47**     | 14.1**      | 16.61**     | 5.53**          | 8.05**      | 5.04**      | 8.03**      |

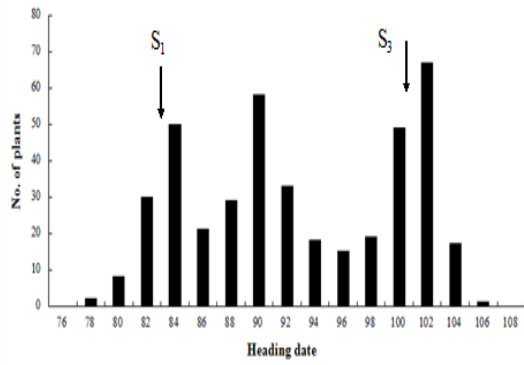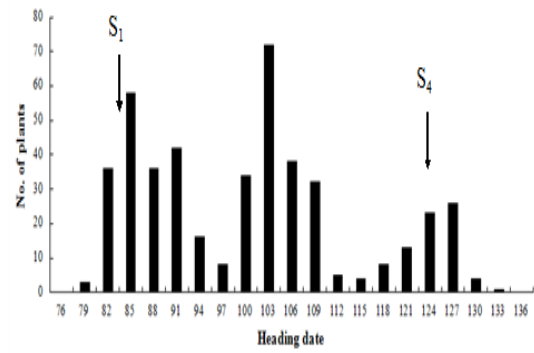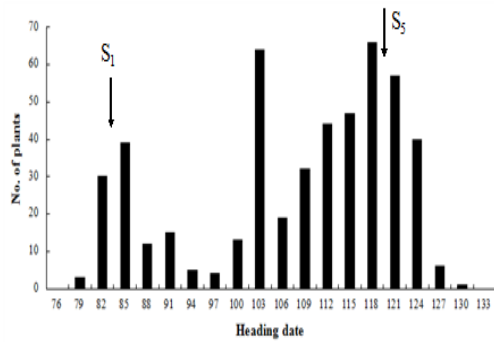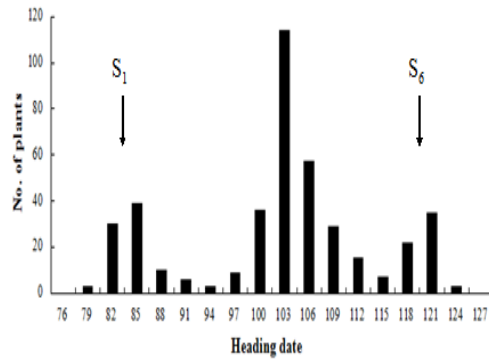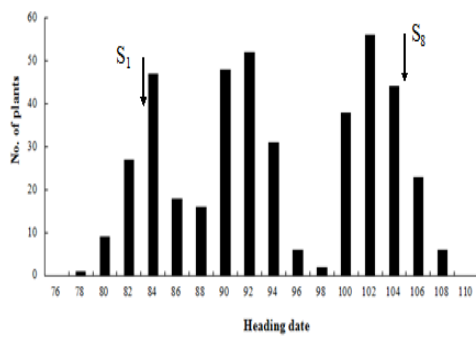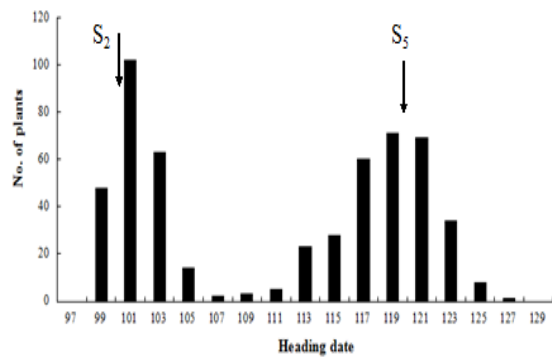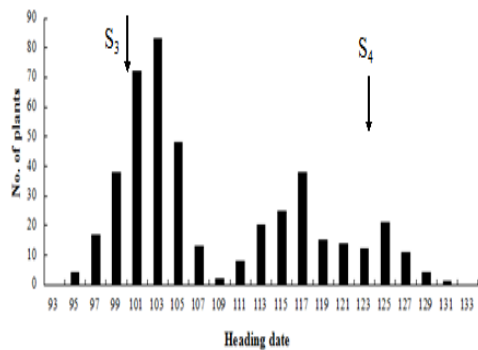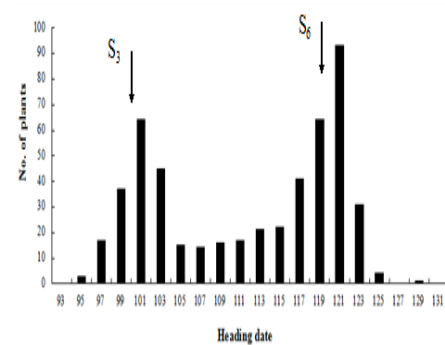

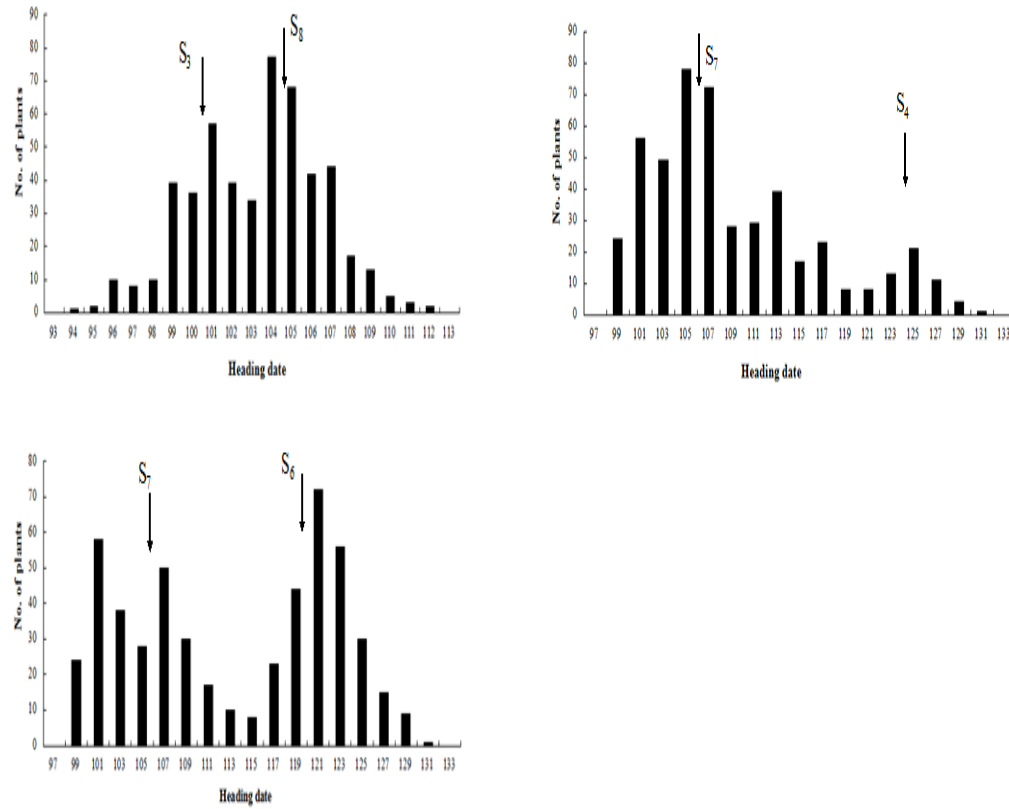

**Supplementary Fig. 1** Heading date frequency distributions of F<sub>2</sub> populations from two single segment substitution lines in the early season of 2014. S<sub>i</sub> represented single segment substitution line SSSL<sub>i</sub>

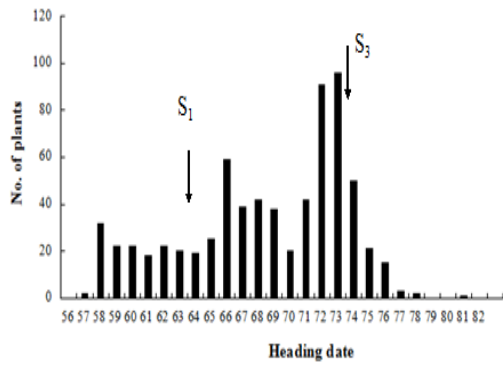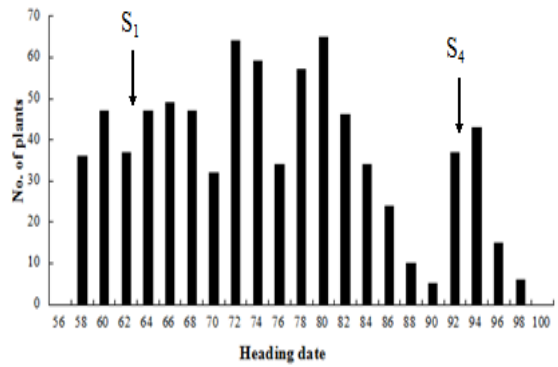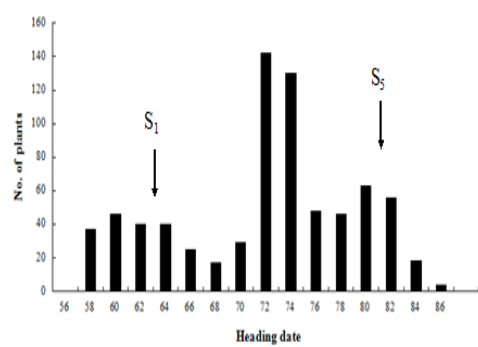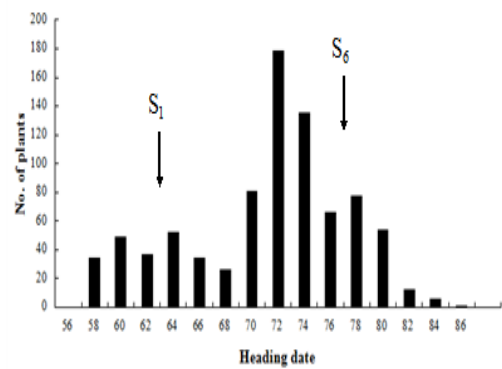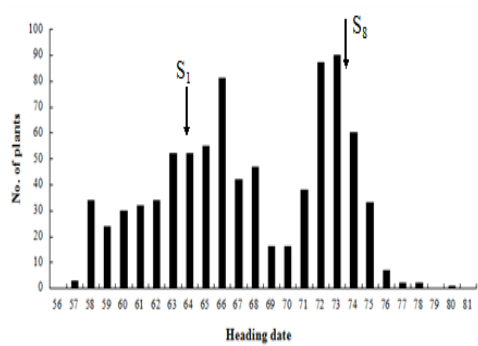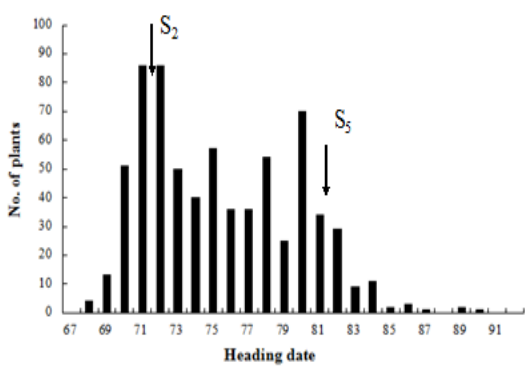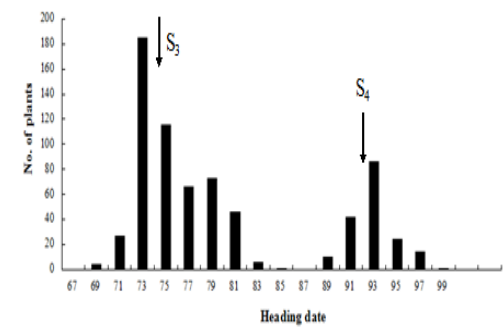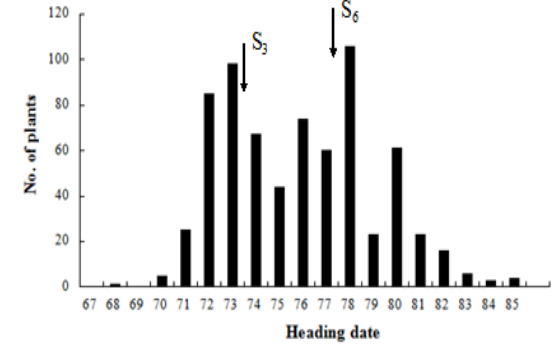

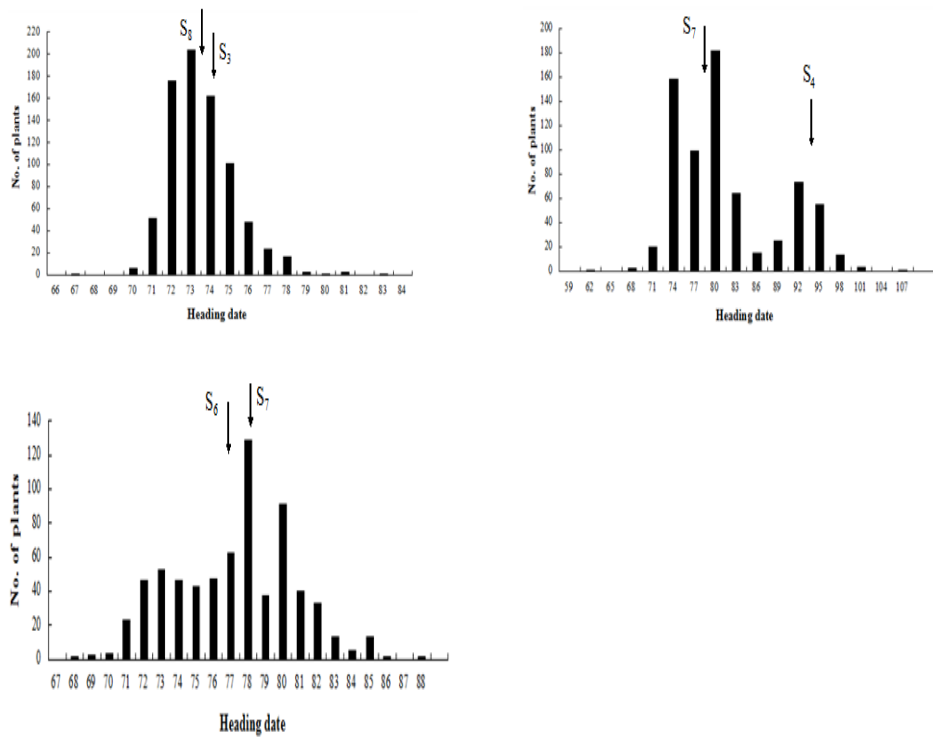

**Supplementary Fig. 2** Heading date frequency distributions of F<sub>2</sub> populations from two single segment substitution lines in the late season of 2014. S<sub>i</sub> represented single segment substitution line SSSL<sub>i</sub>.
